# Supplementary material
Source: Frontiers journal article supplement (https://www.frontiersin.org/articles/424961)

**Supplementary Figure S1:** Light microscopy (A, B) and FISH experiment (C - F) on *E. aediculatus* EASCc1 (C, D, E: 0% Formamide; F: 15% formamide). **A.** General view of a living cell. **B.** The cytostome with many *Polynucleobacter necessarius* (arrow) and few “*Ca. Nebulobacter yamunensis*” (arrowhead). **C.** Positive signals from numerous bacteria inside the host cytoplasm targeted by the probe EUB338\_Fluo detecting almost 90% of known Eubacteria (arrow). **D.** Positive signals from numerous bacteria inside the host cytoplasm targeted by the probe Poly\_862\_cy3, specific for *Polynucleobacter* genus (arrow). **E.** Positive signals both in cytoplasm and inside phagosomes, highlighting the presence of *Gammaproteobacteria* targeted by the probe Gamma\_42 (arrow). **F.** *Gammaproteobacteria* targeted by the probe NebProbe\_203 specific for “*Ca. Nebulobacter yamunensis*” (arrow). Scale bars: 10  $\mu$ m.

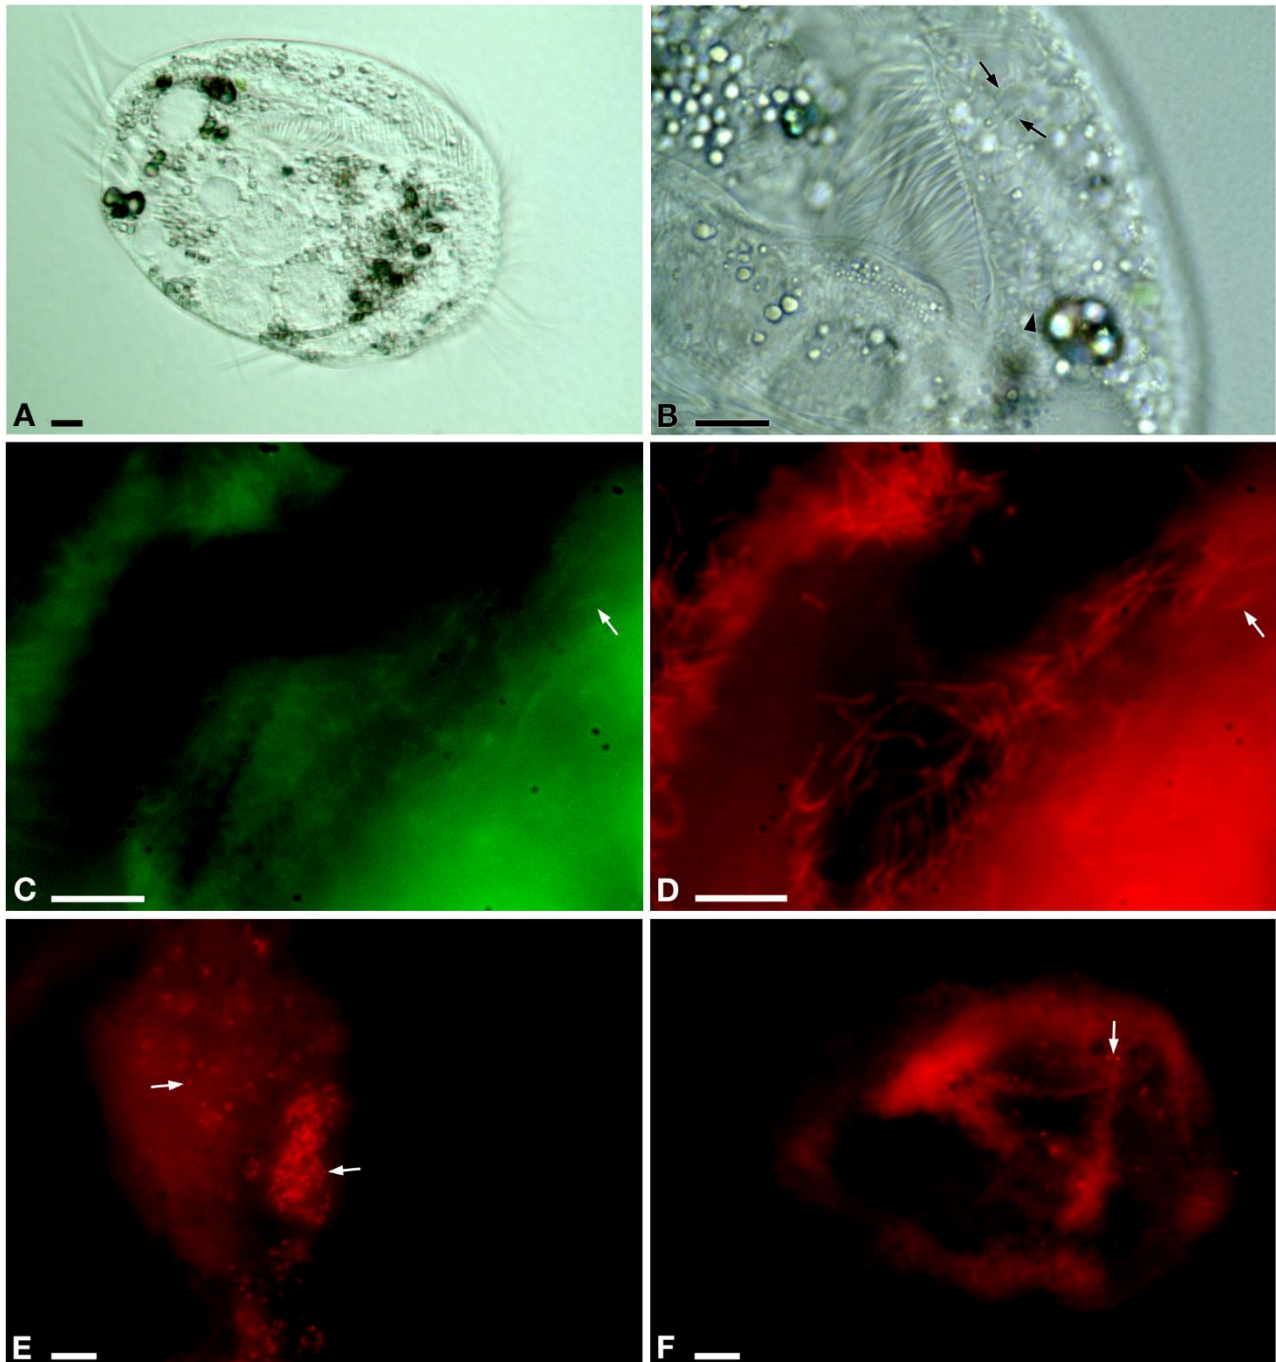

**Supplementary Figure S2:** Culture experiment. Five different replicates (indicated by five different colors), monitored over 210 minutes, performed to test the effect of TSB medium (C+) on the growth and survival of *E. aediculatus* EASCc1. Variation in cell number is reported as % with respect to T0 cell number (100%).

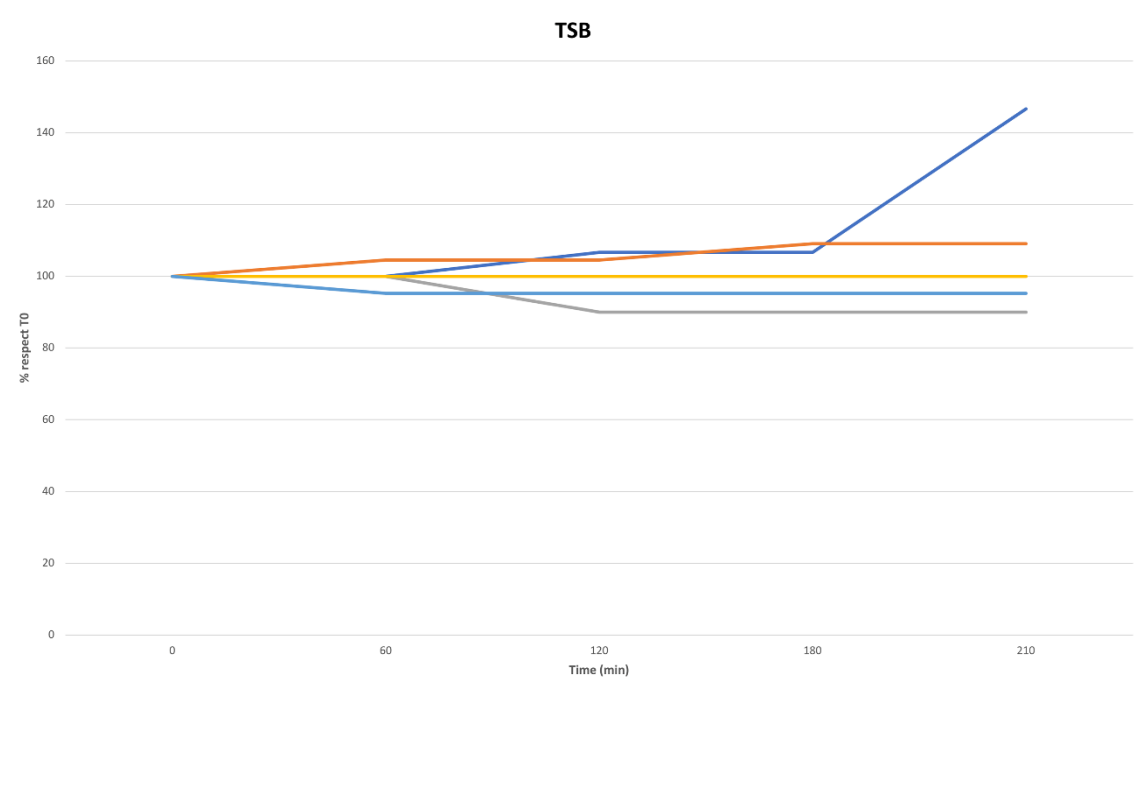

**Supplementary Figure S3:** FISH experiment on *Rheinheimera* sp. EpRS3 (0% formamide). **A.** Positive signals from numerous free-living bacteria targeted by the probe EUB\_338\_Fluo. **B.** Positive signals from bacteria targeted by the probe Rhein443 cy3 specific for *Rheinheimera* genus. Scale bars: 10  $\mu$ m.

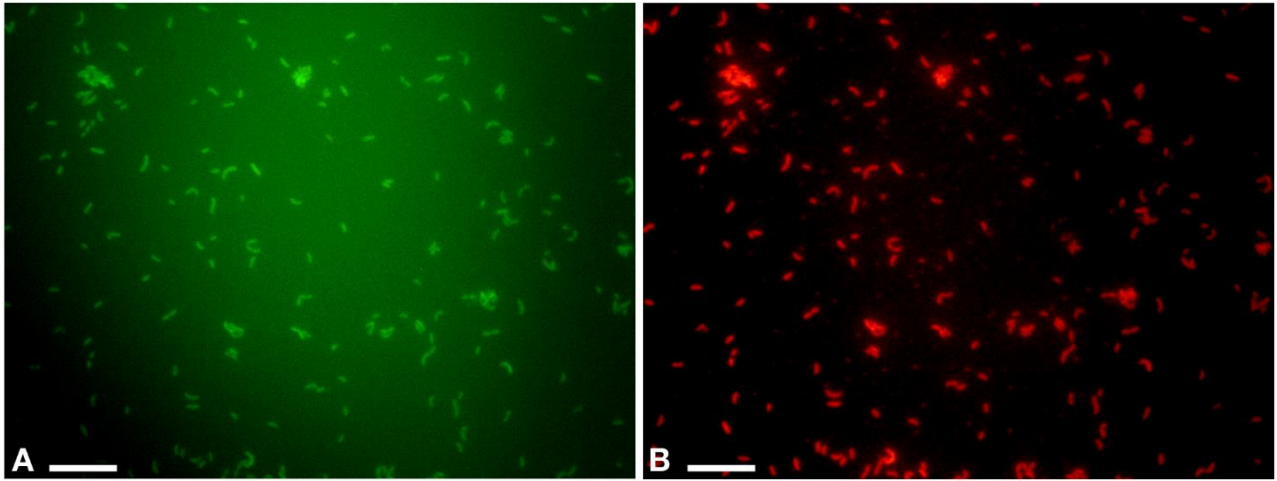

**Supplementary Figure S4:** FISH experiment on Tq-treated *E. aediculatus* EASCC1 cells (0% formamide) using probe Rhein443 in red (targeting *Rheinheimera* genus): signals of Rhein443\_cy3 probe corresponding to *Rheinheimera* sp. EpRS3 cells on ciliate surface. Scale bar: 10  $\mu$ m.

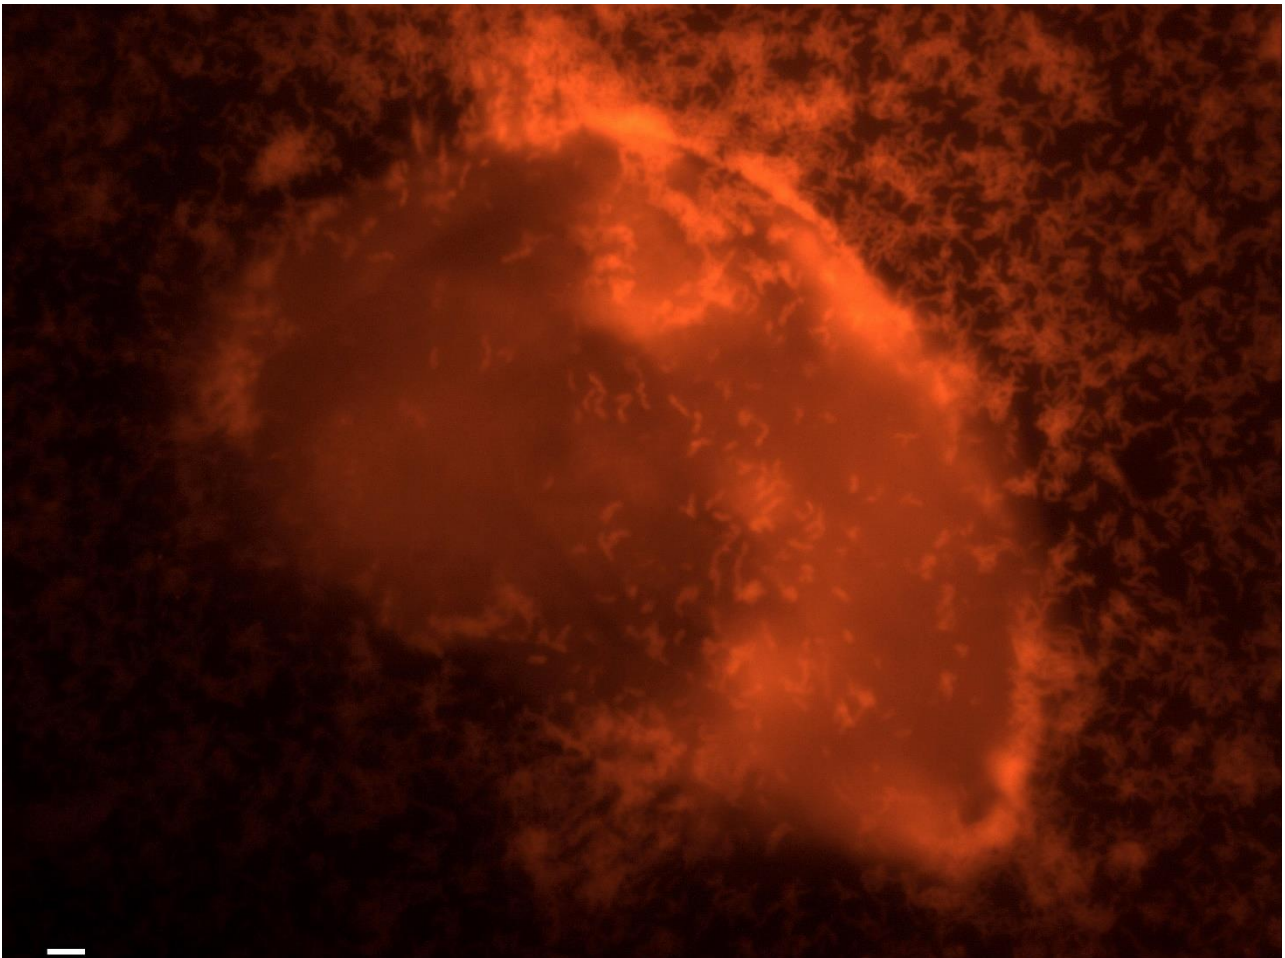

**Supplementary Figure S5:** investigation on putative production of hydrogen peroxide by *Rheinheimera* sp. EpRS3 strain. Left side: different amounts of hydrogen peroxides were placed on the PB-TSA medium, revealing the appearance of the blue precipitate. White values stand for the nanomoles of H<sub>2</sub>O<sub>2</sub> in each drop. Right side: 5-days growth of *Rheinheimera* sp. EpRS3 strain on PB-TSA medium.

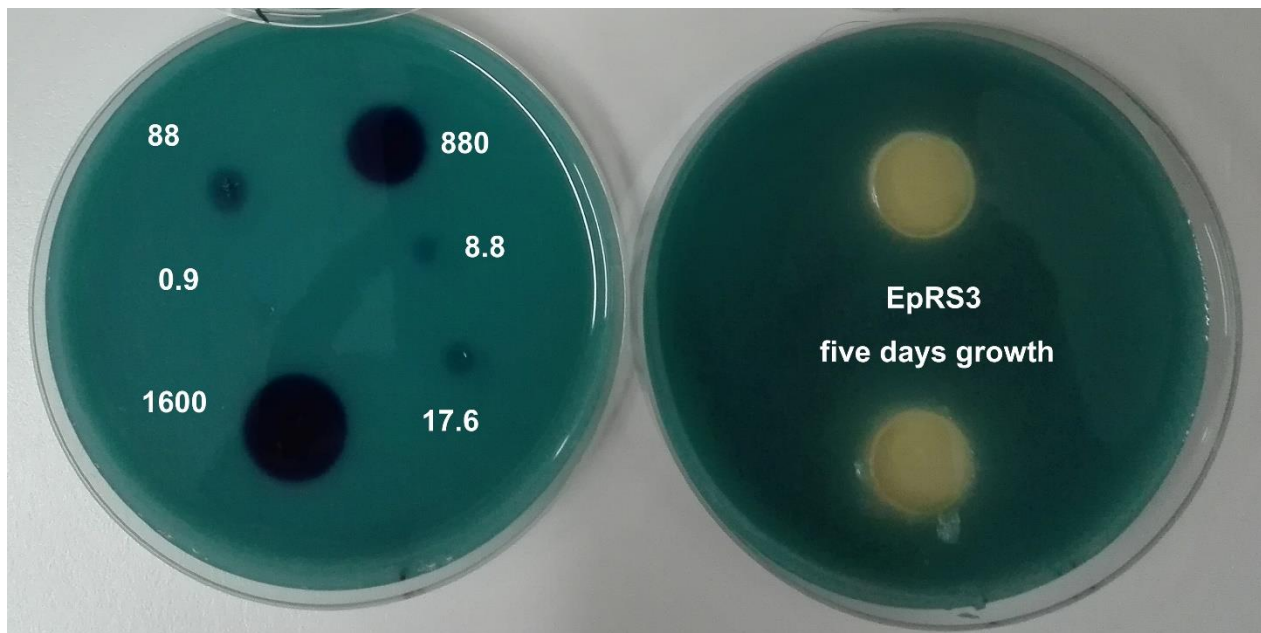

Supplement: Data_Sheet_1.PDF [file Data_Sheet_1.PDF]
